## AMMONIA EXCRETION IN FRESHWATER RAINBOW TROUT (*ONCORHYNCHUS MYKISS*) AND THE IMPORTANCE OF GILL BOUNDARY LAYER ACIDIFICATION: LACK OF EVIDENCE FOR $\text{Na}^+/\text{NH}_4^+$ EXCHANGE

ROD W. WILSON\*, PAM M. WRIGHT, STEVE MUNGER  
AND CHRIS M. WOOD

*Department of Biology, McMaster University, 1280 Main Street West, Hamilton,  
Ontario, Canada L8S 4K1*

*Accepted 8 March 1994*

### Summary

Net ammonia fluxes ( $J_{\text{Amm}}$ ) were measured in adult freshwater rainbow trout *in vivo* under a variety of conditions designed to inhibit unidirectional sodium uptake ( $J_{\text{in}}^{\text{Na}}$ ; low external  $[\text{NaCl}]$ ,  $10^{-4} \text{ mol l}^{-1}$  amiloride), alter transbranchial  $P_{\text{NH}_3}$  and  $\text{NH}_4^+$  gradients [24 h continuous  $(\text{NH}_4)_2\text{SO}_4$  infusion, or exposure to  $1 \text{ mmol l}^{-1}$  external total ammonia at pH 8] and prevent gill boundary layer acidification ( $5 \text{ mmol l}^{-1}$  HEPES buffer). Inhibition of  $J_{\text{in}}^{\text{Na}}$  with amiloride or low external  $[\text{NaCl}]$  under normal conditions reduced  $J_{\text{Amm}}$  by about 20%, but did not prevent the net excretion of ammonia during exposure to high concentrations of external ammonia. Increasing the buffer capacity of the ventilatory water with HEPES buffer (pH 8) reduced  $J_{\text{Amm}}$  by 36% and abolished the effect of amiloride on ammonia excretion.

No evidence could be found to support a directly coupled apical  $\text{Na}^+/\text{NH}_4^+$  exchange. We suggest that any dependence of ammonia excretion on sodium uptake is caused by alteration of transbranchial  $P_{\text{NH}_3}$  gradients within the gill microenvironment secondary to changes in net  $\text{H}^+$  excretion. Under normal conditions (pH 8, low external ammonia) gill boundary layer acidification facilitates over one-third of the total ammonia excretion. During exposure to high concentrations of external ammonia in poorly buffered water, estimates of transbranchial  $P_{\text{NH}_3}$  gradients from measurements of bulk water pH and total ammonia concentration ( $T_{\text{Amm}}$ ) may be grossly in error because of boundary layer acidification. Prevention of boundary layer acidification with HEPES buffer during exposure to high concentrations of external ammonia revealed that the local transbranchial  $P_{\text{NH}_3}$  gradient at the gill may in fact be positive (blood to water), negating the need for an active  $\text{NH}_4^+$  transport mechanism. In freshwater trout,  $\text{NH}_3$  diffusion may account for all ammonia excretion under all experimental conditions used in the present study.

\*Present address: School of Biological Sciences, 638 Stopford Building, Manchester University, Oxford Road, Manchester M13 9PT, UK.

Key words: trout, gills, ammonia excretion, sodium uptake, gill boundary layer, ionoregulation, acid–base regulation, *Oncorhynchus mykiss*.

### Introduction

Teleost fish excrete the majority of their nitrogenous waste as ammonia (Smith, 1929). By far the largest proportion of this ammonia output occurs at the gills (Smith, 1929; Sayer and Davenport, 1987) and results from clearance of ammonia from the blood (Payan and Matty, 1975; Cameron and Heisler, 1983; Ogata and Murai, 1988) as it crosses the arterio-arterial circuit through the lamellae (Payan *et al.* 1984). Under normal conditions of low ambient [ammonia], the transbranchial ammonia gradients ( $\Delta P_{\text{NH}_3}$  and  $\Delta \text{NH}_4^+$ ) are positive (from blood to water). The bulk of experimental evidence indicates at least three potential mechanisms for the extrusion of ammonia across fish gills: passive diffusion of  $\text{NH}_3$  down a partial pressure gradient, passive diffusion of  $\text{NH}_4^+$  down an electrochemical gradient, and an apically located electroneutral exchange of intracellular  $\text{NH}_4^+$  for either external  $\text{Na}^+$  or external  $\text{H}^+$  (see reviews by Cameron and Heisler, 1985; Evans and Cameron, 1986; Randall and Wright, 1987; Wood, 1993). Despite numerous attempts to quantify the importance of each of these transport mechanisms, branchial ammonia transfer still remains the subject of much debate.

The passive diffusion of  $\text{NH}_4^+$  is probably only of quantitative importance in seawater teleosts, where ionic permeabilities are high (Girard and Payan, 1980; Evans, 1984). In contrast, the gills of freshwater fish are considered to be very 'tight' epithelia (Sardet, 1980; Pisam *et al.* 1987) and transbranchial diffusion of  $\text{NH}_4^+$  is almost certainly negligible under normal conditions (Wright and Wood, 1985; McDonald and Prior, 1988). In contrast, diffusion of  $\text{NH}_3$  appears to drive a major portion of net ammonia excretion under resting conditions, effected by transbranchial  $P_{\text{NH}_3}$  gradients in the 50–100 nmHg range (Cameron and Heisler, 1983; Wright and Wood, 1985; Heisler, 1990).

Indirect evidence for the existence of an apically situated  $\text{Na}^+/\text{NH}_4^+$  exchanger relies predominantly on two observations: (i) correlations between the rate of unidirectional  $\text{Na}^+$  influx ( $J_{\text{in}}^{\text{Na}}$ ) and net ammonia excretion ( $J_{\text{Amm}}$ ) under certain conditions (Maetz and Garcia-Romeu, 1964; Maetz, 1973; Payan, 1978; Wright and Wood, 1985; Wood, 1988, 1989; McDonald and Prior, 1988) and (ii) the observation that teleosts can apparently maintain negative (inwardly directed) or zero  $P_{\text{NH}_3}$  and  $\text{NH}_4^+$  gradients during prolonged exposure to elevated external total ammonia levels (Cameron and Heisler, 1983; Cameron, 1986; Claiborne and Evans, 1988; Wilson and Taylor, 1992). However, with present techniques it is impossible to distinguish between a directly coupled exchange of  $\text{NH}_4^+$  for  $\text{Na}^+$  and the diffusion of  $\text{NH}_3$  occurring simultaneously alongside a classical  $\text{Na}^+/\text{H}^+$  exchange (Kinsella and Aronson, 1981) or a primary  $\text{H}^+$ -ATPase/ $\text{Na}^+$  channel arrangement (Avella and Bornancin, 1989; Lin and Randall, 1991). In addition, the accurate measurement of transbranchial  $P_{\text{NH}_3}$  gradients is severely hampered because water passing over the gills is acidified by  $\text{CO}_2$  excretion and/or  $\text{H}^+$  and  $\text{HCO}_3^-$  transport processes (Wright *et al.* 1986; Playle and Wood, 1989; Lin and Randall, 1990).

In the present study we have evaluated the dependence of ammonia excretion on the  $\text{Na}^+$  uptake mechanism *in vivo* using treatments that reduce  $J_{\text{in}}^{\text{Na}}$  (low external  $[\text{Na}^+]$  and the  $\text{Na}^+$  transport inhibitor amiloride), under normal and two 'ammonia-loaded' conditions (infusion of ammonium sulphate and exposure to high external ammonia) that

might be expected to stimulate such an exchanger. In addition, we have tested the role of gill boundary layer acidification in branchial ammonia excretion using an artificially buffered medium ( $5 \text{ mmol l}^{-1}$  HEPES) under normal and high external ammonia conditions.

## Materials and methods

### *Animals and surgery*

Rainbow trout [*Oncorhynchus mykiss* (Walbaum); 197–463 g] were obtained from Spring Valley Trout Farm, Petersburg, Ontario, Canada, and held in flowing dechlorinated Hamilton tap water ( $[\text{Na}^+] \approx 0.6 \text{ mequiv l}^{-1}$ ,  $[\text{Cl}^-] \approx 0.8 \text{ mequiv l}^{-1}$ ,  $[\text{Ca}^{2+}] \approx 2.0 \text{ mequiv l}^{-1}$ ,  $[\text{Mg}^{2+}] \approx 0.3 \text{ mequiv l}^{-1}$ ,  $[\text{K}^+] \approx 0.05 \text{ mequiv l}^{-1}$ , titration alkalinity  $\approx 2.1 \text{ mequiv l}^{-1}$ ,  $\text{pH} \approx 8.0$ , temperature,  $8\text{--}16^\circ\text{C}$ ). At least 1 week prior to experiments animals were transferred to a  $15^\circ\text{C}$  acclimation tank and food was withheld to allow stabilisation of the endogenous fraction of waste nitrogen excretion (Fromm, 1963). For experiments requiring sequential blood sampling, trout were anaesthetised (MS222,  $0.05 \text{ g l}^{-1}$ ; Sigma) and fitted with a dorsal aortic catheter filled with heparinised Cortland saline (Wolf, 1963;  $50 \text{ i.u. ml}^{-1}$  sodium heparin; Sigma) as described by Soivio *et al.* (1972). All fish, catheterised and uncatheterised, were subsequently transferred to individual, darkened, well-aerated acrylic flux boxes continuously supplied with temperature-controlled ( $15 \pm 0.5^\circ\text{C}$ ), dechlorinated tap water and allowed to recover for 48 h prior to experiments.

### *Experimental series*

The following six experimental treatments were employed to assess the importance of  $\text{Na}^+$  uptake and boundary layer acidification in the excretion of ammonia across the gills.

#### *Series 1*

In series 1, eight uncatheterised trout ( $330.6 \pm 32.6 \text{ g}$ ) were exposed for 3 h to low external  $[\text{Na}^+]$  to determine the dependence of ammonia excretion on the  $\text{Na}^+$  uptake mechanism. For the low  $[\text{Na}^+]$  exposure, boxes were flushed three times with an artificial hard water containing no NaCl but made up to duplicate the  $[\text{Ca}^{2+}]$ ,  $[\text{Mg}^{2+}]$ , titratable alkalinity and pH of dechlorinated Hamilton tap water. This artificial hard water was made as described by Goss and Wood (1990), who showed that exposure to this medium caused no changes in transepithelial potential (TEP), in contrast to exposure to distilled water. Series 1 was carried out over a 3 day period with two 3 h control fluxes being performed on days 1 and 3, exactly 24 h prior to, and following, the low NaCl experimental exposure on day 2. Water samples for flux calculations were taken every 15 min during each of the 3 h flux periods to allow high resolution of any rapid changes in  $J_{\text{Amm}}$ .

#### *Series 2*

In series 2, we attempted to artificially stimulate  $\text{Na}^+/\text{NH}_4^+$  exchange in catheterised trout ( $230.9 \pm 8.2 \text{ g}$ ,  $N=7$ ) by ammonium sulphate infusion. We also tested the dependence

of  $J_{\text{Amm}}$  on  $J_{\text{in}}^{\text{Na}}$  by inhibiting apical sodium uptake pharmacologically using  $10^{-4} \text{ mol l}^{-1}$  amiloride (Sigma; a  $10^{-2} \text{ mol l}^{-1}$  stock solution was prepared immediately before use by sonicating amiloride-HCl in distilled water for approximately 10 s). The effects of amiloride were tested both before and after ammonia loading. We predicted that under 'control' (pre-infusion) conditions, amiloride should have a similar effect to the low external  $[\text{Na}^+]$  treatment in series 1. After testing the effects of amiloride under control conditions, the same animals were then continuously infused with  $70 \text{ mmol l}^{-1}$  ammonium sulphate over 24 h to allow stabilisation of a new steady state under ammonia-loaded conditions. This protocol differs from previous studies on ammonia excretion, in which bolus injections of ammonium salts have been used to create non-steady-state ammonia loading (e.g. Maetz, 1973; Cameron and Heisler, 1983; McDonald and Prior, 1988). The ammonium sulphate solution  $[(\text{NH}_4)_2\text{SO}_4; T_{\text{Amm}}=140 \text{ mmol l}^{-1}$ , adjusted to pH 7.8] was infused through the dorsal aortic catheter using a peristaltic pump (Gilson, Minipuls) at a rate estimated to approximately quadruple the normal  $J_{\text{Amm}}$ . In practice, the mean infusion rate was  $4.014 \pm 0.265 \text{ ml kg}^{-1} \text{ h}^{-1}$  ( $N=7$ ), which provided a total ammonia input of  $562.0 \pm 37.1 \mu\text{mol kg}^{-1} \text{ h}^{-1}$ . In this ammonia-loaded state,  $J_{\text{Amm}}$  and unidirectional  $\text{Na}^+$  fluxes were then measured in the absence and presence of external amiloride. 1 h flux periods were employed both under control conditions (pre-infusion) and following 24 h of ammonium sulphate infusion. In each case a 1 h flux in the absence of amiloride was followed by a 1 h period of flow-through, and then by a second 1 h flux in the presence of amiloride.

### Series 3

These experiments consisted of exposing trout to high external ammonia concentrations (HEA; nominal  $T_{\text{Amm}}=1000 \mu\text{mol l}^{-1}$  as ammonium sulphate, pH $\approx$ 8), which reverses the normally positive transbranchial ammonia gradients. HEA treatment was continued for 24 h to allow stabilisation of a new steady state. In 16 catheterised trout ( $284.5 \pm 14.3 \text{ g}$ ), transbranchial ammonia gradients were estimated from blood and water samples taken immediately before, and after 1, 5 and 24 h of HEA. Net ammonia and unidirectional sodium fluxes were measured under identical conditions in 16 uncatheterised trout ( $242.9 \pm 7.7 \text{ g}$ ). In the latter group, 3 h flux periods were used during the pre-HEA control period and from 0 to 3, 4 to 7 and 21 to 24 h of HEA, with water samples taken at 1 h intervals within each flux period.

### Series 4

In Series 4, the HEA protocol of series 3 was repeated in uncatheterised trout ( $287.1 \pm 28.5 \text{ g}$ ,  $N=7$ ), but after 24 h of HEA the final flux period was continued for a further 6 h following the addition of  $10^{-4} \text{ mol l}^{-1}$  amiloride to inhibit any  $\text{Na}^+/\text{NH}_4^+$  exchange. No blood sampling was carried out in this series.

### Series 5

The effect of buffering the water on  $J_{\text{Amm}}$  under control conditions was examined by exposing eight uncatheterised trout ( $300.9 \pm 21.9 \text{ g}$ ,  $N=8$ ) to  $5 \text{ mmol l}^{-1}$  Hepes buffer at pH 8 for 6 h. A  $500 \text{ mmol l}^{-1}$  stock solution of Hepes buffer (Sigma; Hepes free acid) was

made up immediately before use and adjusted to pH 8.0 with  $1 \text{ mol l}^{-1}$  KOH. All flux periods lasted 1 h and were immediately followed by 1 h of flow-through of the appropriate medium (see below). After a pre-experimental control period, fish were exposed to Hepes buffer for 6 h with flux measurements being made at 0–1, 2–3 and 4–5 h of exposure to buffer. Amiloride ( $10^{-4} \text{ mol l}^{-1}$ ) was then added to the flux boxes in the continued presence of Hepes buffer to assess whether the effects of amiloride on  $J_{\text{Amm}}$  could be accounted for by pH changes at the gill surface, rather than by inhibition of  $\text{Na}^+/\text{NH}_4^+$  exchange. Following 1 h of exposure to Hepes buffer+amiloride, the boxes were returned to flow-through of control dechlorinated tap water for 1 h and followed by a final post-experimental control flux period.

#### *Series 6*

In series 6 the HEA protocol of series 3 was repeated using catheterised trout ( $313.9 \pm 12.9 \text{ g}$ ,  $N=8$ ), but after 24 h of HEA the final flux period was continued for a further 6 h following the addition of  $5 \text{ mmol l}^{-1}$  Hepes buffer, to maintain the bulk water pH at approximately 8 but to prevent any localised acidification of inspired water within the gill boundary layers. Blood samples were taken pre-HEA (control), after 1, 5 and 24 h of HEA, and after 2, 4 and 6 h of HEA+buffer.  $J_{\text{Amm}}$  fluxes were measured in the same animals during the control period, at 0–3, 4–7 and 22–24 h of HEA and at 0–6 h of HEA+buffer.

#### *Experimental protocols*

Each experimental series was started with a single control flux (lasting 1–3 h). Following all control and experimental fluxes, each box was flushed three times with a fresh quantity of the appropriate external medium without disturbance to the fish. The box was then returned to a flow-through arrangement for at least 1 h before beginning any subsequent flux period. During a flux period, ammonia obviously accumulates gradually within the boxes and is then rapidly reduced when the boxes are flushed at the end of the flux measurement. The 1 h flow-through recovery period between fluxes was necessary to allow transbranchial ammonia gradients to return to normal by the time the next flux period commences.

Flow-through arrangements during the prolonged experimental exposures when flux measurements were not being made (e.g. high external ammonia for 24 h) consisted of recirculating a 300 l reservoir of the appropriate medium through the flux boxes such that each box received a flow of at least  $500 \text{ ml min}^{-1}$ . In these cases the recirculated volume was maintained at pH 8.0 using an automatic titration assembly (Radiometer TTT80 titrator, PHM84 pH meter and GK2041C combination electrode).

For measurements of net ammonia and sodium exchanges between the fish and their external medium, the flux chambers were operated as closed, recirculating, low-volume systems (1.9–2.6 l) as previously described (Goss and Wood, 1990). In experiments where unidirectional  $\text{Na}^+$  fluxes were measured,  $^{22}\text{Na}$  was added to give a final activity of  $1 \mu\text{Ci l}^{-1}$  at the beginning of each flux period. In series where amiloride and/or Hepes buffer were also used, all were added within 1 min of each other. In all cases, a 2 min mixing period was allowed before the initial water samples were taken. Periods when the

flux boxes were closed lasted 1–6 h, depending on the experimental series, and water was sampled at 15 min or 1 h intervals for the analysis of pH,  $T_{\text{Amm}}$ ,  $[\text{Na}^+]$  and  $^{22}\text{Na}$  in counts  $\text{min}^{-1}$ . Water samples for  $T_{\text{Amm}}$  and  $[\text{Na}^+]$  analyses (10 ml) were stored frozen until required ( $-20^\circ\text{C}$ ).

#### *Analytical techniques*

In experiments where blood was sampled, 400  $\mu\text{l}$  of blood was drawn through the dorsal aortic catheter into chilled gas-tight 1 ml syringes (Hamilton), and this volume was immediately replaced with saline. In the case of the ammonium sulphate infusion experiment, particular care was taken to avoid contaminating the sampled blood with any infusate still present in the catheter. The infusion line was first disconnected from the catheter and then the catheter was cleared by infusing a small volume of Cortland saline. The catheter was then filled with blood and flushed three times before finally withdrawing the blood sample. Arterial pH, plasma total  $\text{CO}_2$  and haematocrit (Hct) were analysed immediately upon collection. Whole-blood pH was measured using a Radiometer G279/G2 glass capillary electrode and K497 calomel reference electrode, connected to a PHM 71 acid–base analyser. Total  $\text{CO}_2$  was measured on 50  $\mu\text{l}$  samples of true plasma using a  $\text{CO}_2$  analyser (Corning 965). True plasma was obtained anaerobically by centrifuging (9000  $g$  for 2 min) 80  $\mu\text{l}$  of blood in a sodium-heparinised microhaematocrit tube sealed at the upper end with a drop of paraffin oil. Plasma for measurement of  $T_{\text{Amm}}$  was obtained by centrifugation (10 000  $g$  for 2 min) and stored frozen ( $-70^\circ\text{C}$ ) for later analysis by a micro-modification of a commercial diagnostic kit (GLDH/NADH; Sigma 170-UV). Whole-blood [Hb] was determined using the cyanmethaemoglobin method (Sigma kit no. 525). Whole-blood [lactate] was measured enzymatically (L-lactate dehydrogenase/NADH at 340 nm) using Sigma reagents.

Water pH was measured immediately on samples taken from individual flux boxes using a Radiometer combination pH electrode (GK2401C) and meter (PHM84). Water  $T_{\text{Amm}}$  was measured in duplicate for ‘low external ammonia’ experiments ( $T_{\text{Amm}} < 150 \mu\text{mol l}^{-1}$ ) using a modified salicylate–hypochlorite method (Verdouw *et al.* 1978). The accuracy and sensitivity of this method for detecting changes in water  $T_{\text{Amm}}$  during the high external ammonia experiments were improved by (i) bracketing the sample range with 800–1400  $\mu\text{mol l}^{-1}$  standards, (ii) using the 800  $\mu\text{mol l}^{-1}$  standard to set the spectrophotometer absorbance readout to zero, and (iii) measuring all samples and standards in triplicate. For experiments involving low  $[\text{NaCl}]$  media, amiloride or Hepes buffer, additional standards were prepared within the appropriate background matrix and assayed simultaneously with samples.

Water total  $[\text{Na}^+]$  was determined by atomic absorption spectrophotometry (Varian AA1275) on undiluted samples.  $^{22}\text{Na}$  radioactivity was counted in triplicate on 5 ml water samples in 10 ml of ACS fluor (Amersham) on a liquid scintillation counter (LKB Wallac 1217 Rackbeta).

#### *Calculation of derived variables*

$P_{\text{NH}_3}$  and  $[\text{NH}_4^+]$  in plasma and water were calculated from their respective pH and  $T_{\text{Amm}}$  values using the rearranged Henderson–Hasselbalch equation and using values of

pK' and NH<sub>3</sub> solubility determined by Cameron and Heisler (1983). Plasma P<sub>CO<sub>2</sub></sub> and [HCO<sub>3</sub><sup>-</sup>] values were similarly calculated from measurements of plasma T<sub>CO<sub>2</sub></sub> and whole-blood pH, using a rearrangement of the Henderson–Hasselbalch equation and values for CO<sub>2</sub> solubility and pK' derived from Boutilier *et al.* (1984). The net metabolic (or non-respiratory) acid load ( $\Delta H_m^+$ ) was calculated according to the formula of McDonald *et al.* (1980), using non-bicarbonate buffer values estimated from the blood [Hb] and the regression relationship of Wood *et al.* (1982).

Transbranchial P<sub>NH<sub>3</sub></sub> and [NH<sub>4</sub><sup>+</sup>] gradients ( $\Delta P_{NH_3}$  and  $\Delta[NH_4^+]$ ) were calculated by simple subtraction:

$$\Delta P_{NH_3} = P_{NH_3} \text{ in plasma} - P_{NH_3} \text{ in water}, \quad (1)$$

where plasma was taken from the dorsal aorta and was therefore postbranchial in origin. In freshwater rainbow trout, the ammonia excreted by the gills is essentially cleared from the blood (Cameron and Heisler, 1983). Ideally, the mean plasma concentration in blood passing through the gill ( $([arterial] + [venous])/2$ ) should be used to determine the transbranchial gradients. In some previous studies under normal conditions, this has been predicted from the arterial plasma concentration alone, assuming a constant *ratio* for T<sub>Amm</sub> in pre- and postbranchial blood (from 1.66 to 1.81; Cameron and Heisler, 1983; Wright and Wood, 1985; Ogata and Murai, 1988). However, we deemed such an approach highly problematic for the present study, in which blood T<sub>Amm</sub> levels changed greatly in response to experimental treatments. Indeed, it is probably more correct to assume a constant *difference* between arterial and venous levels, since the ratio does not remain constant under conditions where the ambient T<sub>Amm</sub> is raised (see Cameron and Heisler, 1983). In the end, we used a conservative approach whereby transbranchial gradients were simply calculated from dorsal aortic blood plasma measurements. This undoubtedly resulted in an underestimate of  $\Delta P_{NH_3}$  and  $\Delta NH_4^+$  during all conditions.

Net flux rates of total ammonia ( $J_{Amm}$ ) were calculated from the appearance or disappearance of total ammonia from the water as:

$$J_{Amm} = ([T_{Amm}]_i - [T_{Amm}]_f) \times V / (t \times M), \quad (2)$$

where T<sub>Amm,i</sub> and T<sub>Amm,f</sub> are initial and final T<sub>Amm</sub> concentrations ( $\mu\text{mol l}^{-1}$ ) in the water, V is the water volume (l) in the box during the flux period, t is the time elapsed (h) during the flux period and M is the mass of the fish (kg). A positive  $J_{Amm}$  indicates net excretion and a negative value indicates net uptake of ammonia.

Unidirectional sodium influx rates ( $J_{in}^{Na}$ ) were calculated as described by Wood (1988):

$$J_{in}^{Na} = (R_i - R_f) \times V / (SA \times t \times M), \quad (3)$$

where R<sub>i</sub> and R<sub>f</sub> are initial and final radioactivities in water (cts min<sup>-1</sup> ml<sup>-1</sup>), SA is the mean specific activity (cts min<sup>-1</sup>  $\mu\text{equiv}^{-1}$ ) over the flux period in question, and other symbols are as in equation 2. Radioisotope backflux correction (Maetz, 1956) was only required for the final 6 h flux in series 3, when internal specific activity exceeded 5% of the external activity.

Data have been expressed as mean  $\pm$  S.E.M. (N=number of animals or number of water samples). Changes in measured variables between the control and the different

experimental treatments were compared using a Student's paired two tailed *t*-test ( $P < 0.05$ ) within each series, using each animal as its own control.

## Results

### *Low external [Na<sup>+</sup>] (series 1)*

For the control fluxes in Fig. 1, external [Na<sup>+</sup>] averaged  $534.3 \pm 3.6 \mu\text{mol l}^{-1}$  ( $N=16$ ). This was reduced to  $19.5 \pm 3.8 \mu\text{mol l}^{-1}$  ( $N=8$ ) at the beginning of the low [Na<sup>+</sup>] exposure, but had increased to  $60.4 \pm 6.8 \mu\text{mol l}^{-1}$  ( $N=8$ ) by the end of the 3 h experimental flux period. Thus, external [Na<sup>+</sup>] remained well below the  $K_m$  of  $114 \mu\text{mol l}^{-1}$  and should have maintained  $J_{\text{in}}^{\text{Na}}$  at less than  $20 \mu\text{mol kg}^{-1} \text{h}^{-1}$ , based on kinetic uptake curves reported for freshwater rainbow trout *in vivo* under identical conditions (Goss and Wood, 1990).

During the first 15 min of exposure to low external [Na<sup>+</sup>],  $J_{\text{Amm}}$  was significantly reduced by 24 % when compared to the combined average  $J_{\text{Amm}}$  during the initial 15 min intervals of the two control periods (Fig. 1). For statistical purposes, data from the two control fluxes (days 1 and 3) were pooled to allow for a small decline in  $J_{\text{Amm}}$  noticed between these two control periods (amounting to a drop in  $J_{\text{Amm}}$  of about 6 % per day). Over the whole 3 h experimental flux period  $J_{\text{Amm}}$  was significantly reduced by a similar amount (22.9 %), indicating that there were no rapid changes in ammonia excretion that would be missed by using flux periods of 1 h or more (Fig. 1).

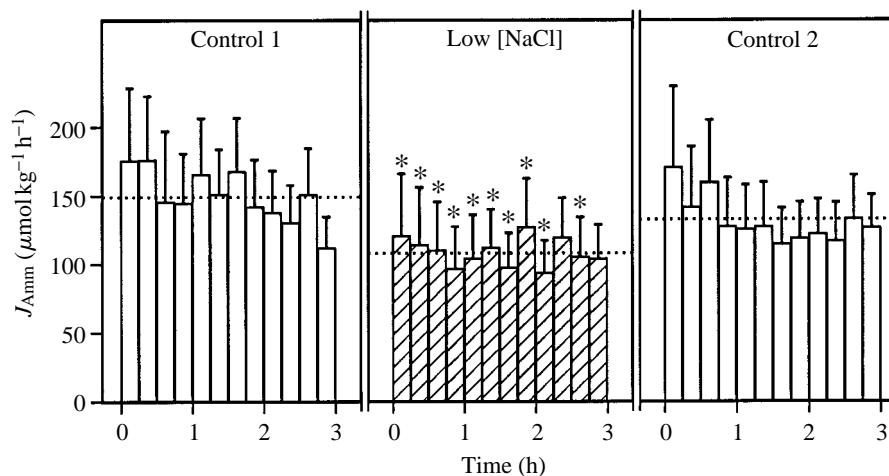

Fig. 1. The effect of a 3 h exposure to low [NaCl] on ammonia excretion ( $J_{\text{Amm}}$ ; measured every 15 min) in rainbow trout. The two control periods (open bars) were performed 24 h before and 24 h after the experimental period (hatched bars). Horizontal dotted lines represent the mean values for each 3 h flux periods ( $149.6 \pm 35.9$ ,  $108.5 \pm 29.3$  and  $131.8 \pm 32.7 \mu\text{mol kg}^{-1} \text{h}^{-1}$  for control 1, low [NaCl] and control 2 periods, respectively). Asterisks represent significant changes ( $P < 0.05$ ) in  $J_{\text{Amm}}$  for each 15 min flux measurement when compared with the corresponding pooled value from control periods 1 and 2 (see text for details). Means  $\pm$  S.E.M. ( $N=8$ ).



*Ammonium sulphate infusion and exposure to amiloride (series 2)*

Addition of  $10^{-4} \text{ mol l}^{-1}$  amiloride to the external water prior to ammonium sulphate infusion reduced  $J_{\text{in}}^{\text{Na}}$  from  $173 \pm 19$  to  $33 \pm 9 \mu\text{mol kg}^{-1} \text{ h}^{-1}$ , an inhibition of 81 % (Fig. 2). During the same treatment  $J_{\text{Amm}}$  was inhibited by only 18 % (Fig. 2). The effect of sodium uptake blockade on  $J_{\text{Amm}}$  was, therefore, similar to the effect of NaCl removal in series 1. Following 24 h of continuous infusion with  $70 \text{ mmol l}^{-1}$  ammonium sulphate,  $J_{\text{Amm}}$  and  $J_{\text{in}}^{\text{Na}}$  were both significantly increased by approximately equivalent amounts (3.7-fold and 3.8-fold, respectively). The measured elevation of  $J_{\text{Amm}}$  ( $549 \pm 41 \mu\text{mol kg}^{-1} \text{ h}^{-1}$ ) was not significantly different from the calculated infusion rate ( $562 \pm 37 \mu\text{mol kg}^{-1} \text{ h}^{-1}$ ), indicating that a new equilibrium state had been achieved. Ammonium sulphate infusion produced a small but significant systemic acidosis: arterial blood pH was reduced from  $7.932 \pm 0.019$  during the control period to  $7.851 \pm 0.017$  ( $N=7$ ) after 24 h of continuous infusion.

When trout were subsequently exposed to  $10^{-4} \text{ mol l}^{-1}$  amiloride (following 26 h of

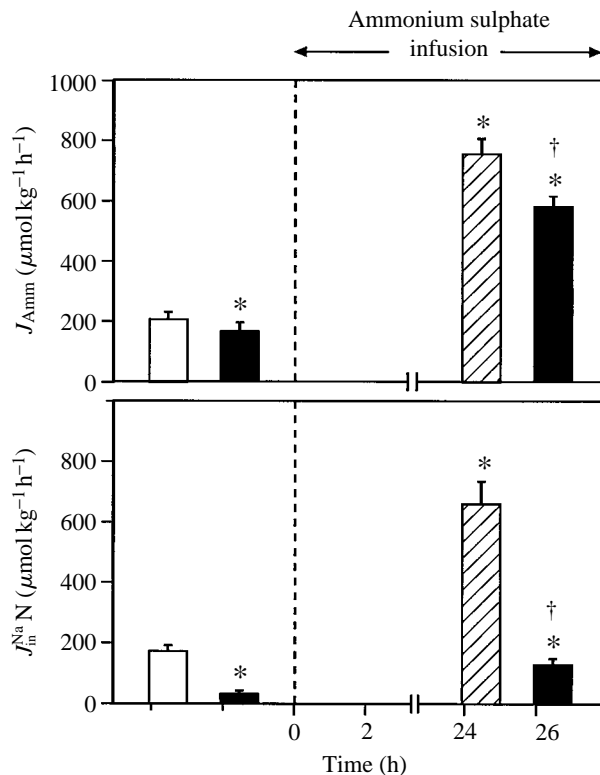

Fig. 2. The effect of externally applied amiloride ( $10^{-4} \text{ mol l}^{-1}$ ; filled bars) on ammonia excretion ( $J_{\text{Amm}}$ ) and sodium uptake ( $J_{\text{in}}^{\text{Na}}$ ) in rainbow trout before (open bar) and after 24 h of continuous infusion with  $70 \text{ mmol l}^{-1}$  ammonium sulphate (hatched bar). Asterisks denote values significantly different ( $P < 0.05$ ) from the pre-infusion control value, and daggers represent values significantly different from the flux after 24 h of infusion. Mean  $\pm$  S.E.M. ( $N=7$ ).

ammonium sulphate infusion),  $J_{in}^{Na}$  was reduced by 80 % and  $J_{Amm}$  by 23 %, very similar to the proportional reductions caused by amiloride during control conditions (prior to infusion). However, the absolute reductions in  $J_{in}^{Na}$  and  $J_{Amm}$  were correspondingly 3.8 and 4.6 times greater than during the pre-infusion amiloride treatment.

*High external ammonia (series 3)*

Exposure to a high concentration of external ammonia (HEA;  $T_{Amm}=1106\pm 12\ \mu\text{mol l}^{-1}$ ,  $\text{pH}=8.05\pm 0.01$ ,  $N=48$ ) resulted in a rapid increase in arterial plasma  $T_{Amm}$ , reaching a relatively stable value of  $765\pm 38\ \mu\text{mol l}^{-1}$  after 5 h, still  $341\ \mu\text{mol l}^{-1}$  below the external  $T_{Amm}$  (Fig. 3). Under control conditions the  $P_{NH_3}$  and  $[NH_4^+]$  gradients were slightly positive, but both were dramatically reversed on exposure to HEA, also reaching new stable values after 5 h but remaining strongly negative throughout the experimental period (Fig. 3).

Initially, exposure to HEA resulted in a period of net ammonia uptake from the water, reversing the normally positive  $J_{Amm}$  (i.e. ammonia excretion) seen under control

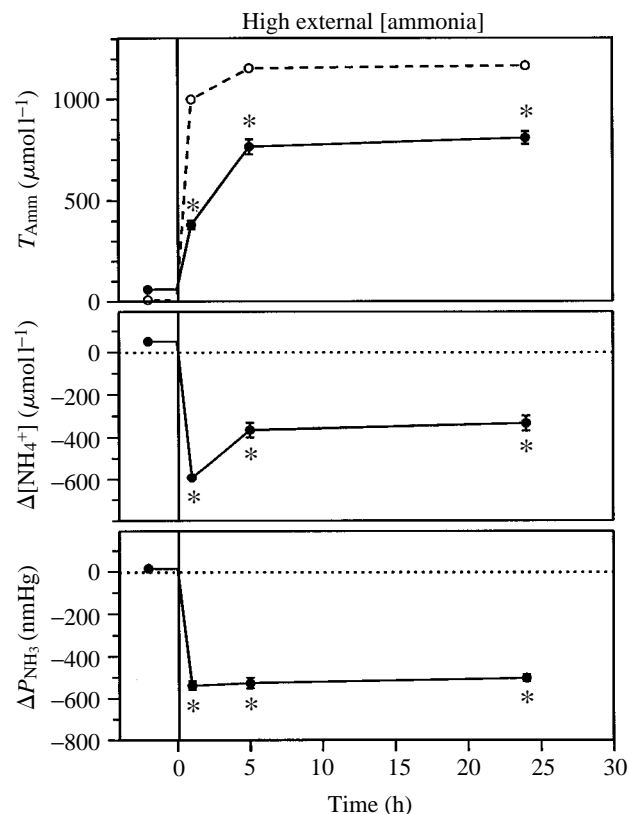

Fig. 3. The effect of 24 h of exposure to high external ammonia (HEA) on plasma (solid line) and water (dashed line)  $T_{Amm}$ , and the blood-to-bulk-water  $[NH_4^+]$  and  $P_{NH_3}$  gradients in rainbow trout. Asterisks indicate values significantly different ( $P < 0.05$ ) from the pre-HEA control value. Mean  $\pm$  S.E.M. ( $N=16$ ).

conditions (Fig. 4). In fact, the *influx* of ammonia during the first hour of HEA was almost three times greater in magnitude than the normal *efflux* rate. However, this reversal of the net ammonia flux was short-lived and trout began to excrete ammonia again after about 5 h, coinciding with the stabilisation of plasma  $T_{\text{Amm}}$  and transbranchial gradients (Figs 3 and 4). After 24 h of HEA,  $J_{\text{Amm}}$  was not significantly different from the control rate.

Sodium uptake was reduced to half the control  $J_{\text{in}}^{\text{Na}}$  during the second hour of HEA exposure (Fig. 4). However, this inhibitory effect was transitory and, after 24 h,  $J_{\text{in}}^{\text{Na}}$  appeared to have stabilised at a level 32% greater than the control rate. A mild but persistent blood alkalosis was observed after 5 h of exposure to HEA. This was of a non-respiratory origin (indicated by the negative  $\Delta\text{H}_{\text{m}}^+$ ), despite a moderate increase in blood lactate concentration (Fig. 5).

#### High external ammonia and amiloride (series 4)

In series 4 the changes in  $J_{\text{Amm}}$  and  $J_{\text{in}}^{\text{Na}}$  over the first 24 h of HEA (Fig. 6) followed patterns similar to those described in series 3 above. This was as expected, since the external  $T_{\text{Amm}}$  and pH were very similar to those measured in the previous series ( $T_{\text{Amm}}=1113\pm 7 \mu\text{mol l}^{-1}$ ,  $\text{pH}=8.03\pm 0.02$ ,  $N=32$ ).

On addition of amiloride after 24 h of HEA, water pH remained unchanged during the following 6 h ( $8.03\pm 0.02$ ,  $N=16$ ) and  $J_{\text{in}}^{\text{Na}}$  was reduced by 96% overall. Despite this almost complete blockade of sodium uptake, trout continued to excrete ammonia but at a

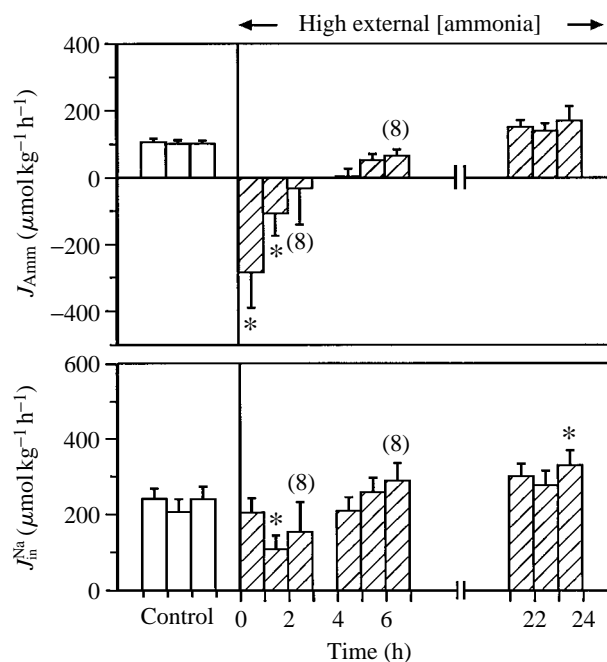

Fig. 4. The effect of 24 h of exposure to high external ammonia (HEA; hatched bars) on net ammonia fluxes ( $J_{\text{Amm}}$ ) and unidirectional sodium uptake ( $J_{\text{in}}^{\text{Na}}$ ) in rainbow trout. Asterisks represent values significantly different ( $P < 0.05$ ) from the pre-HEA control value (open bars). Mean  $\pm$  S.E.M. ( $N=16$ , except where indicated in parentheses).

reduced rate ( $J_{\text{Amm}}$  was inhibited by 27 % during the first hour and 36 % overall), but at no time was  $J_{\text{Amm}}$  reversed in the presence of amiloride (Fig. 6).

*Hepes buffer and amiloride under control conditions (series 5)*

Buffering the external medium with  $5 \text{ mmol l}^{-1}$  Hepes under control conditions (i.e. low external  $T_{\text{Amm}}$ ) immediately reduced  $J_{\text{Amm}}$  by 36 % (Fig. 7). Bulk water pH (pH<sub>w</sub>) was unchanged by the addition of Hepes buffer [pH<sub>w</sub> averaged  $8.11 \pm 0.03$  ( $N=16$ ) for the two control periods and  $8.06 \pm 0.02$  ( $N=24$ ) for the three fluxes following the addition of Hepes buffer].  $J_{\text{Amm}}$  recovered slightly during the subsequent 4 h in buffered medium but stabilised at a rate that was still below the control  $J_{\text{Amm}}$ . In contrast to previous experiments using the sodium uptake inhibitor amiloride (series 2 and 4), addition of  $10^{-4} \text{ mol l}^{-1}$  amiloride had no effect on  $J_{\text{Amm}}$  when trout were maintained in the buffered medium (Fig. 7). The post-experimental control period was similar to the initial control period, highlighting the rapid reversibility of both Hepes buffer and amiloride treatments.

*High external ammonia and Hepes buffer (series 6)*

The first 24 h of HEA treatment in series 6 was essentially a repeat of the protocols used

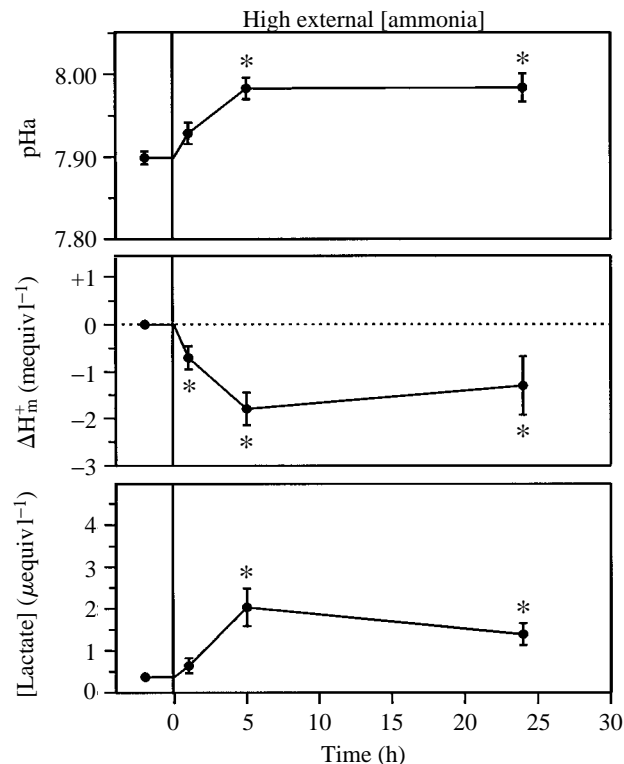

Fig. 5. The effect of 24 h of exposure to high external ammonia (HEA) on whole-blood pH, net non-respiratory acid load ( $\Delta H_m^+$ ) and lactate concentration in rainbow trout. Asterisks indicate values significantly different ( $P < 0.05$ ) from the pre-HEA control value. Mean  $\pm$  S.E.M. ( $N=16$ ).

in series 3 and 4. The measured external  $T_{\text{Amm}}$  and pH in series 6 were slightly lower than in the two previous regimes, averaging  $1025 \pm 8 \mu\text{mol l}^{-1}$  ( $N=80$ ) and  $7.95 \pm 0.03$  ( $N=40$ ) respectively. As in series 3, elevating the external  $T_{\text{Amm}}$  caused a rapid increase in plasma  $T_{\text{Amm}}$  (Fig. 8). After 24 h, plasma  $T_{\text{Amm}}$  was  $471 \pm 40 \mu\text{mol l}^{-1}$  ( $N=7$ ), still well below the external level, and both  $P_{\text{NH}_3}$  and  $\text{NH}_4^+$  gradients were highly negative (Fig. 8).

During the first 24 h of HEA,  $J_{\text{Amm}}$  changes were similar to those seen previously in series 3 and 4 (Fig. 9). Matching of the bulk water pH before and after the addition of Hepes buffer was not exact; bulk water in the flux boxes was maintained at the slightly lower pH of  $7.81 \pm 0.02$  ( $N=32$ ) during the 6 h of HEA+buffer treatment. Addition of Hepes buffer resulted in an immediate reversal of  $J_{\text{Amm}}$  (Fig. 9). This persisted for the first hour, and by the third hour trout were again excreting ammonia at a rate not significantly different from either the control rate or that after 24 h of HEA. The recovery of net ammonia excretion was accompanied by an increase in the  $P_{\text{NH}_3}$  gradient such that, after 4 h of HEA+buffer treatment,  $\Delta P_{\text{NH}_3}$  was no longer significantly different from the positive partial pressure gradient observed during the control period (Fig. 8).

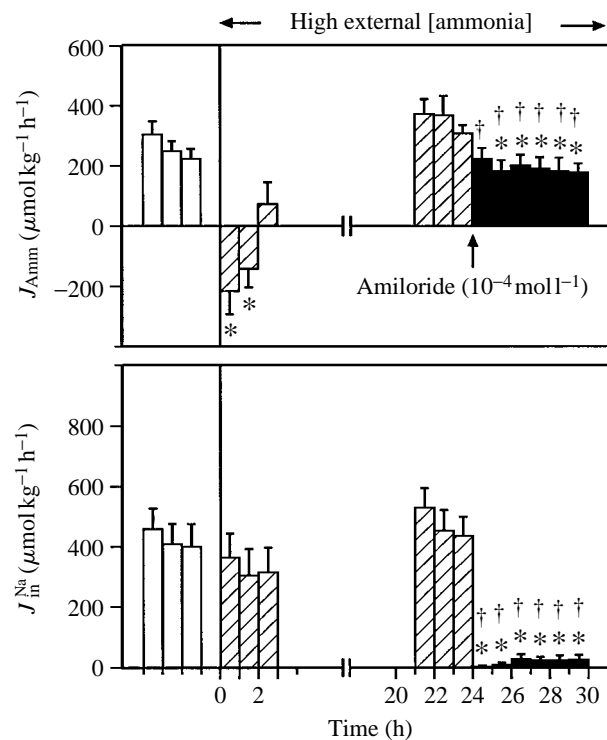

Fig. 6. The effect of amiloride ( $10^{-4} \text{mol l}^{-1}$ ; filled bars) on net ammonia fluxes ( $J_{\text{Amm}}$ ) and unidirectional sodium uptake ( $J_{\text{in}}^{\text{Na}}$ ) following 24 h of exposure to high external ammonia (HEA; hatched bars) in rainbow trout. Asterisks represent values significantly different ( $P < 0.05$ ) from the pre-HEA control value (open bars), and daggers represent values significantly different from the final flux at 24 h of HEA. Mean  $\pm$  S.E.M. ( $N=7$ ).

### Discussion

#### *The link between sodium uptake and ammonia efflux under control conditions*

Results from the experiments using low  $[\text{Na}^+]$  or amiloride indicate that only about 20% of the net ammonia efflux is dependent upon the active uptake of external  $\text{Na}^+$  under control conditions. This is slightly lower than the 23–30% reductions seen in previous reports of the acute effects of amiloride on freshwater trout preparations *in vivo* (Wright and Wood, 1985) and *in vitro* (Kirschner *et al.* 1973; Payan, 1978; Wright *et al.* 1989). Many people have previously interpreted this as a blockade of the smaller fraction of ammonia excretion that is driven by  $\text{Na}^+/\text{NH}_4^+$  exchange, with the remaining 70–80% of ammonia excretion being the result of passive  $\text{NH}_3$  diffusion under normal conditions.

#### *Ammonium sulphate infusion*

Our attempts to stimulate  $\text{Na}^+/\text{NH}_4^+$  exchange by infusing ammonium sulphate produced equivalent increases in both  $J_{\text{in}}^{\text{Na}}$  and  $J_{\text{Amm}}$ , suggesting stimulation of directly coupled  $\text{Na}^+/\text{NH}_4^+$  exchange. However, if this increased sodium uptake was entirely due to an increase in the rate of  $\text{Na}^+/\text{NH}_4^+$  exchange, then the subsequent addition of amiloride, which reduced  $\text{Na}^+$  influx by 80%, should have reduced  $J_{\text{Amm}}$  back to the control level. Instead ammonia excretion continued at a highly elevated rate and was reduced by only about 23% relative to the rate after 24 h infusion. Thus, the increased rate of ammonia efflux was still largely independent of sodium uptake. Nevertheless, the absolute rate of ammonia excreted that could be inhibited by amiloride was increased from 37 to  $169 \mu\text{mol kg}^{-1} \text{h}^{-1}$  following ammonium sulphate infusion. Thus, it could be

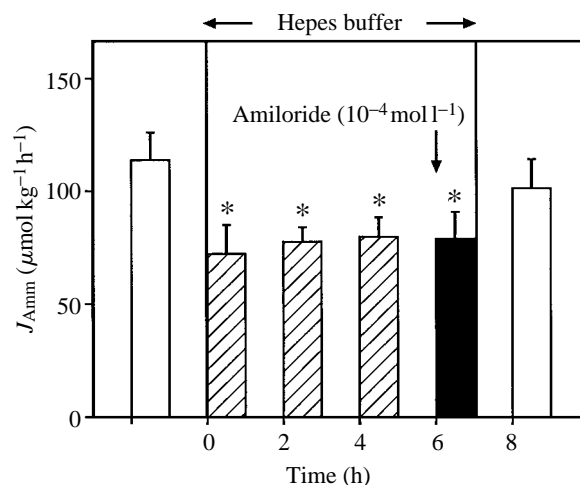

Fig. 7. The effect of buffering ventilatory water ( $5 \text{ mmol l}^{-1}$  HEPES; pH 8.06; hatched bars) on ammonia excretion ( $J_{\text{Amm}}$ ), and the subsequent effect of amiloride ( $10^{-4} \text{ mol l}^{-1}$ ; filled bar), on rainbow trout under control conditions. Asterisks represent values significantly different ( $P < 0.05$ ) from the initial value (open bars). Note that the second control period (post-experimental) was not significantly different from the pre-experimental control period, indicating complete reversibility of the HEPES and amiloride treatments. Mean  $\pm$  S.E.M. ( $N=8$ ).

argued that a 4.5-fold stimulation of  $\text{Na}^+/\text{NH}_4^+$  exchange had occurred. Of course, infusion of ammonium sulphate will simultaneously increase both  $\text{NH}_3$  and  $\text{NH}_4^+$  concentrations in the blood, so one would also expect an elevation of the  $P_{\text{NH}_3}$  diffusion gradient across the gills. Unfortunately, plasma values for  $T_{\text{Amm}}$  are not available for this experiment owing to accidental loss of frozen samples. However, it seems logical to assume that some fraction of the increased  $J_{\text{Amm}}$  during infusion was due to an accelerated diffusive efflux of  $\text{NH}_3$ . In fact, the more rapid efflux of  $\text{NH}_3$  following infusion of an ammonium salt, leaving behind a strong acid (in this case sulphuric acid), is the usual explanation for a post-infusion extracellular acidosis (Cameron and Kormanik, 1982; Cameron and Heisler, 1983; Claiborne and Evans, 1988; McDonald and Prior, 1988). Indeed, it is tempting to attribute the parallel increase in sodium influx following ammonium sulphate infusion to this increased number of protons in the

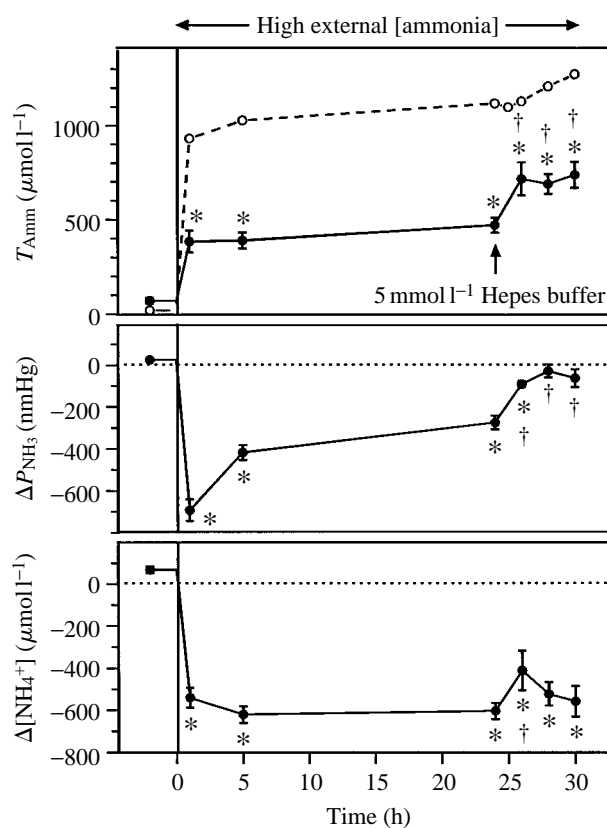

Fig. 8. The effect of adding  $5 \text{ mmol l}^{-1}$  Hepes buffer to the external water following 24 h of exposure to high external ammonia on  $T_{\text{Amm}}$  in plasma (solid line) and water (dashed line), blood-to-bulk-water  $[\text{NH}_4^+]$  and  $P_{\text{NH}_3}$  gradients in rainbow trout. Asterisks represent values significantly different ( $P < 0.05$ ) from the pre-HEA control value (open bars), and daggers represent values significantly different from the final flux at 24 h of HEA. Note the fall in water  $T_{\text{Amm}}$  during the first hour of the HEA+buffer flux period, representing a net uptake of ammonia, and the subsequent accumulation of  $T_{\text{Amm}}$  in the water once net excretion has recovered (see Fig. 9 for actual fluxes). Mean  $\pm$  S.E.M. ( $N=8$ ).

extracellular fluid becoming available for enhanced  $\text{Na}^+/\text{H}^+$  exchange or primary  $\text{H}^+$  transport linked to  $\text{Na}^+$  uptake through an apical channel (Goss and Wood, 1991), rather than to an increased availability of  $\text{NH}_4^+$  driving more  $\text{Na}^+/\text{NH}_4^+$  exchange. The moderate acidosis accompanying the infusion supports this idea. Infusion of ammonium bicarbonate, which produces little or no acid-base disturbances (Claiborne and Evans, 1988), could help to resolve this issue.

#### *High external ammonia concentration*

It has been repeatedly observed that teleost fish are able to maintain reversed  $P_{\text{NH}_3}$  and  $\text{NH}_4^+$  gradients when external ammonia levels are elevated (Cameron and Heisler, 1983; Cameron, 1986; Claiborne and Evans, 1988; Wilson and Taylor, 1992). In all these cases it has been concluded that some form of active  $\text{NH}_4^+$  extrusion must be operating in order to counteract the inward diffusion of  $\text{NH}_3$  (and to some degree  $\text{NH}_4^+$  in seawater teleosts) under these extreme conditions. Most commonly, stimulation of apical  $\text{Na}^+/\text{NH}_4^+$  exchange has been advocated as the counteracting mechanism. Results from series 3 clearly demonstrate that the stabilisation of apparently negative  $\Delta P_{\text{NH}_3}$  and  $\Delta \text{NH}_4^+$  was accompanied by the return of ammonia fluxes to net excretion after about 5 h. Thereafter, a steady state of net excretion continued for the entire 24 h exposure period. However, there are two lines of evidence that argue strongly against apical  $\text{Na}^+/\text{NH}_4^+$  exchange as the mechanism of ammonia extrusion during HEA.

First, the addition of amiloride once a new equilibrium had been established in series 4 all but completely inhibited sodium uptake (Fig. 6). If ammonia were being actively extruded by apical  $\text{Na}^+/\text{NH}_4^+$  exchange at this time, the mechanism should have been abolished upon treatment with amiloride, resulting in a reversal of the net ammonia flux. This was not observed. Although  $J_{\text{Amm}}$  was reduced following the elimination of  $\text{Na}^+$  uptake (similar to the 'low external ammonia' amiloride treatments in series 2; see

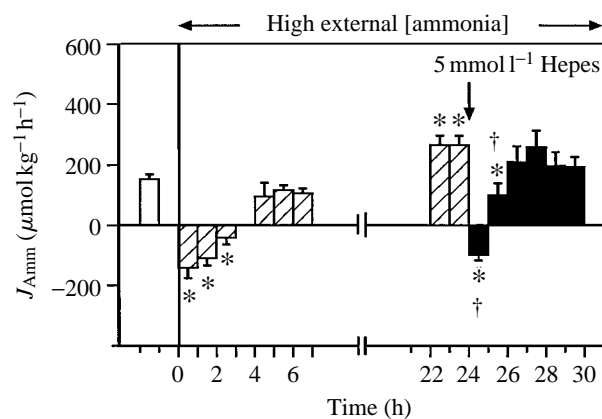

Fig. 9. The effect of adding  $5 \text{ mmol l}^{-1}$  Hepes buffer (filled bars) to the external water following 24 h of exposure to high external ammonia (hatched bars) on net ammonia fluxes ( $J_{\text{Amm}}$ ) in rainbow trout ( $N=8$ ). Asterisks represent values significantly different ( $P<0.05$ ) from the pre-HEA control value (open bars), and daggers represent values significantly different from the final flux at 24 h of HEA. Mean  $\pm$  S.E.M. ( $N=8$ ).



Fig. 2), net ammonia excretion continued when amiloride and high external ammonia were combined. Second, one would anticipate an extremely large increase in  $J_{\text{in}}^{\text{Na}}$  if  $\text{Na}^+/\text{NH}_4^+$  exchange were responsible for the recovery of net ammonia excretion during HEA (Cameron, 1986). If we assume that 80% of the control net ammonia efflux (i.e.  $84 \mu\text{mol kg}^{-1} \text{h}^{-1}$ ) was driven by the control  $\Delta P_{\text{NH}_3}$  (15.3 nmHg) then it follows that the new  $\Delta P_{\text{NH}_3}$  after 24 h of HEA ( $-502 \text{ nmHg}$ ) should support a passive  $\text{NH}_3$  influx of  $2756 \mu\text{mol kg}^{-1} \text{h}^{-1}$ . In order to counteract this using a 1:1  $\text{Na}^+/\text{NH}_4^+$  exchange,  $J_{\text{in}}^{\text{Na}}$  would have to increase by an even greater amount (to allow for the endogenously produced ammonia). Clearly the small increase in  $J_{\text{in}}^{\text{Na}}$  after 24 h ( $90 \mu\text{mol kg}^{-1} \text{h}^{-1}$ ) was insufficient to explain the recovery of net ammonia excretion. Indeed, to our knowledge, rates of unidirectional  $\text{Na}^+$  influx of  $2756 \mu\text{mol kg}^{-1} \text{h}^{-1}$  have never been seen in freshwater trout.

It would appear that apical  $\text{Na}^+/\text{NH}_4^+$  exchange is not a viable explanation for the recovery of net ammonia excretion when the external  $T_{\text{Amm}}$  is elevated. This was the conclusion of Cameron (1986) following a similar analysis on the freshwater channel catfish (*Ictalurus punctatus*). He proposed that a putative  $\text{H}^+/\text{NH}_4^+$  exchange was the only plausible mechanism that fitted the accompanying net acid fluxes he measured during 4 h of HEA in the catfish. However, the apparent net  $\text{H}^+$  flux data of Cameron (1986) are also

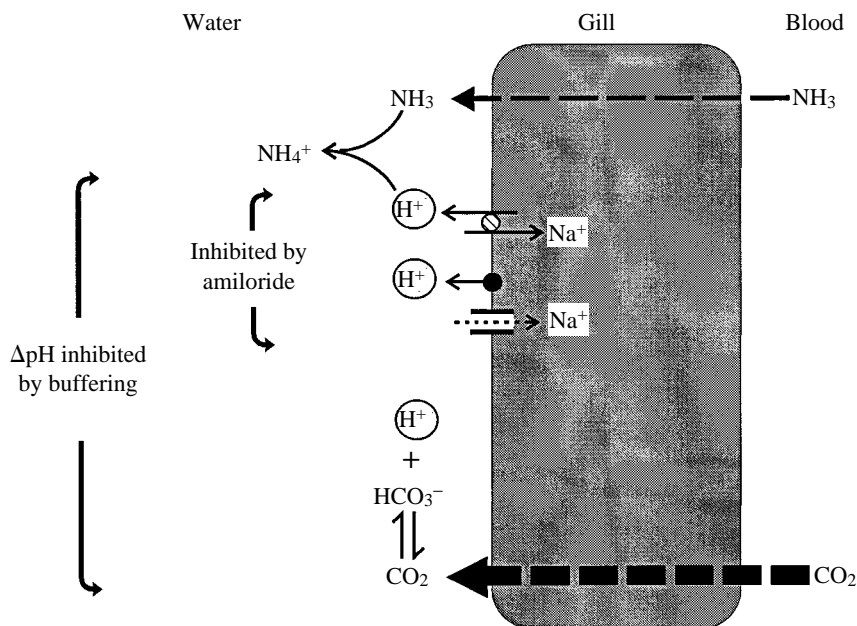

Fig. 10. A schematic diagram of the gill epithelium showing processes thought to be involved in boundary layer acidification and facilitated  $\text{NH}_3$  diffusion (protons added to the apical side of the gill epithelium are enclosed in circles for clarity). Boundary layer acidification due to both  $\text{CO}_2$  hydration and direct  $\text{H}^+$  transport will be inhibited by the addition of buffer to the external water. In contrast, only the fraction of boundary layer acidification due to direct  $\text{H}^+$  excretion can be inhibited by external application of amiloride. Solid arrows represent carrier-mediated transport, broken arrows indicate passive diffusion.

compatible with passive net ammonia excretion by  $\text{NH}_3$  diffusion if the actual transbranchial  $P_{\text{NH}_3}$  gradient within the gill micro-environment returns to a positive value during HEA. This hypothesis depends on the strength of gill boundary layer acidification and is discussed below.

*The importance of gill boundary layer acidification*

In most previous studies it has been assumed that calculation of  $P_{\text{NH}_3}$  in the bulk water surrounding the animal (well mixed by aeration, and equivalent to the inspired water in this case) is a good estimate of the  $P_{\text{NH}_3}$  at the gill surface. However, it has been repeatedly demonstrated that inspired water may be acidified by up to 1.5 pH units as it passes over the gills (Wright *et al.* 1986; Playle and Wood, 1989; Lin and Randall, 1990). In these studies acidification was attributed to the hydration of excreted  $\text{CO}_2$  and/or direct  $\text{H}^+$  transport. However it arises, boundary layer acidification should facilitate branchial ammonia excretion by diffusion-trapping of  $\text{NH}_3$  as  $\text{NH}_4^+$ , i.e. reducing the effective  $P_{\text{NH}_3}$  at the gill surface (Randall and Wright, 1987; Wright *et al.* 1989; Randall *et al.* 1991). Indeed, this is almost certainly the case in all our experiments that used 'normal' fresh water with limited buffer capacity in series 1–4. By adding buffer to the external water in series 5, our goal was to keep the bulk water pH unchanged but to prevent acidification at the gill surface, in order to quantify the role of boundary layer acidification in facilitating ammonia excretion (Fig. 10). If we assume that buffering with HEPES eliminated acidification of inspired water under control conditions, then the 36% reduction in  $J_{\text{Amm}}$  (Fig. 7) suggests that an acidified gill boundary layer normally allows 57% more ammonia to be excreted than one would have predicted from the blood-to-bulk-water  $P_{\text{NH}_3}$  gradient. This effect of buffering ventilatory water agrees well with the *in vitro* results of Wright *et al.* (1989) (where  $J_{\text{Amm}}$  was reduced by approximately 30% in the presence of  $0.4 \text{ mmol l}^{-1}$  Tris buffer, pH 8.0), but contrasts markedly with the 50% increase in  $J_{\text{Amm}}$  found by Avella and Bornancin (1989) when  $50 \text{ mmol l}^{-1}$  Tris buffer (pH 8.0) was added to the irrigation solution of the perfused trout head. Avella and Bornancin (1989) explained the latter result as an increased availability of  $\text{H}^+$  for diffusion-trapping of  $\text{NH}_3$ , but it may have been an artefact produced by the high concentration of Tris used. We have found that Tris prevents colour development in the ammonia assay used and, if it is sufficiently permeable to enter the postbranchial perfusate, may have given rise to lower apparent  $T_{\text{Amm}}$  values, which would be interpreted as increased excretion.

*Boundary layer acidification during high external ammonia exposure*

Acidification of the gill boundary layer could be even more important during high external ammonia exposure, when transbranchial  $P_{\text{NH}_3}$  gradients are expected to be strongly reversed. Based on the mean bulk water  $T_{\text{Amm}}$  at 24 h of HEA in series 3, we calculated that the water layer at the gill surface would only have to be acidified by 0.4 pH units for the actual blood–water  $P_{\text{NH}_3}$  gradient to be positive, rather than the large negative value ( $-502 \text{ nmHg}$ ) that was estimated using the bulk water pH measurements. In other words, if boundary layer acidification were sufficient, then no active  $\text{NH}_4^+$

transport ( $\text{Na}^+/\text{NH}_4^+$  or  $\text{H}^+/\text{NH}_4^+$  exchange) would be required to explain the recovery of net ammonia excretion under HEA. The experiment performed in series 5 tested this hypothesis by again using Hepes buffer to prevent acidification occurring at the gill surface whilst maintaining bulk water pH at the same value (Fig. 9). In fact the addition of the buffer after 24 h of HEA slightly acidified the bulk water, which would tend to make the blood-to-bulk-water  $P_{\text{NH}_3}$  gradient more positive. In contrast,  $J_{\text{Amm}}$  was immediately reversed upon addition of the buffer (Fig. 9), suggesting elimination of a boundary layer acidification that had previously been large enough to create a positive  $\text{NH}_3$  diffusion gradient in the presence of negative  $T_{\text{Amm}}$  and  $[\text{NH}_4^+]$  gradients. It is worth noting here that, in one natural environment where gill boundary layer acidification is difficult or even impossible (the well-buffered alkaline waters of Pyramid Lake, Nevada, USA), ammonia excretion is chronically depressed in the native Lahontan cutthroat trout (*Oncorhynchus clarki henshawi*; Wright *et al.* 1993).

If the above ideas are correct, the  $P_{\text{NH}_3}$  gradients measured when  $J_{\text{Amm}}$  subsequently recovered in the presence of HEA and buffer in series 5 should have returned to the slightly positive value measured under control conditions (Fig. 9). Although the final two mean  $\Delta P_{\text{NH}_3}$  values were not significantly different from the control value, neither was made up of consistently positive values. However, the combination of (i) incomplete buffering, (ii) the underestimation of  $\Delta P_{\text{NH}_3}$  by using arterial plasma ammonia measurements (see Materials and methods) and (iii) the inherent problem of measuring small  $P_{\text{NH}_3}$  gradients (calculated from four independently measured variables) within a background of high  $T_{\text{Amm}}$ , may all have contributed to this discrepancy.

Overall, it would appear that no definite evidence can be found for a role of  $\text{Na}^+/\text{NH}_4^+$  in ammonia excretion during HEA. Instead, the role of boundary layer acidification and the creation of a new outwardly directed  $P_{\text{NH}_3}$  gradient across the gill micro-environment has been highlighted, and appears to be a better explanation for the recovery of net ammonia excretion during HEA. It may even be possible that boundary layer acidification is intensified during HEA. The persistent non-respiratory blood alkalosis during HEA in trout (i.e. net base load or negative  $\Delta\text{H}_m^+$ , despite an increase in blood lactate), coupled with the elevated  $\text{Na}^+$  uptake, indicates an activation of  $\text{H}^+$  excretion that would amplify the pH changes occurring at the gill surface. Increased anaerobic production of lactate may be a secondary response to compensate for the blood alkalosis (Wilkie and Wood, 1991) even though blood oxygen levels are unaffected by HEA (Wilson and Taylor, 1992). However, the proximate signal(s) for an activation of  $\text{H}^+$  excretion (and subsequent activation of glycolysis) remain unexplained. Neither can we explain the opposite acid–base response (i.e. a positive  $\Delta\text{H}_m^+$ ) to HEA in freshwater trout found by Wilson and Taylor (1992), although this could be related to the softer water used and considerably lower plasma  $T_{\text{Amm}}$  achieved in the latter study. Nevertheless, such a response (enhancement of  $\text{H}^+$  excretion) would minimise the plasma  $T_{\text{Amm}}$  and  $P_{\text{NH}_3}$  levels that could be maintained in the face of HEA and in the absence of an active  $\text{NH}_4^+$  transporting mechanism.

*The effect of amiloride on boundary layer acidification and  $J_{\text{Amm}}$*

Amiloride produced a 20–30% reduction in ammonia excretion during the control,

ammonia infusion and HEA exposures, but had no effect on  $J_{\text{Amm}}$  when trout were maintained in a buffered medium (Fig. 7). At  $10^{-4} \text{ mol l}^{-1}$ , amiloride is a potent inhibitor of both the conductive  $\text{Na}^+$  entry pathway (a  $\text{Na}^+$  channel) and electroneutral  $\text{Na}^+/\text{H}^+$  exchange (Benos, 1982; Fig. 10). In freshwater trout, the debate continues as to whether apical sodium uptake is *via* the former (linked to an electrochemical gradient set up by a primary proton pump), or is driven by direct exchange for  $\text{H}^+$  in the latter. Whichever is the case, inhibition of  $\text{Na}^+$  transport by amiloride should simultaneously reduce  $\text{H}^+$  excretion to the apical side of the gill, and hence reduce the extent of boundary layer acidification and lower the blood–water  $P_{\text{NH}_3}$  gradient (Fig. 10). This would explain why amiloride consistently reduced  $J_{\text{Amm}}$  in normal fresh water, but had no effect when the acidification had already been abolished using Hepes buffer. Interestingly, Wright *et al.* (1993) also found no effect of amiloride on  $J_{\text{Amm}}$  in the Lahontan cutthroat trout living in the well-buffered alkaline waters of Pyramid Lake mentioned earlier.

It would appear that the effect of amiloride on  $J_{\text{Amm}}$  in normal fresh water (with minimal buffer capacity) may only be secondary to a reduction in  $\text{H}^+$  excretion and boundary layer acidification. If this is the case, then the use of amiloride, and any other form of sodium uptake blockade, cannot be used as evidence for  $\text{Na}^+/\text{NH}_4^+$  exchange in freshwater fish. Indeed, the existence of ‘ $\text{Na}^+/\text{NH}_4^+$  exchange’ as a directly coupled entity is called into question by our results. Instead, we propose that transbranchial ammonia movements occur almost exclusively by passive  $\text{NH}_3$  diffusion in freshwater trout under a variety of conditions, and stress the importance of gill boundary layer acidification in determining the true  $P_{\text{NH}_3}$  gradients driving branchial ammonia excretion.

This work was supported by a NSERC Research grant to C.M.W. We thank Russ Ellis for excellent technical assistance.

### References

- AVELLA, M. AND BORNANCIN, M. (1989). A new analysis of ammonia and sodium transport through the gills of the freshwater rainbow trout (*Salmo gairdneri*). *J. exp. Biol.* **142**, 155–175.
- BENOS, D. J. (1982). Amiloride: a molecular probe of sodium transport in tissues and cells. *Am. J. Physiol.* **242**, C131–C145.
- BOUTILIER, R. G., HEMING, T. A. AND IWAMA, G. K. (1984). Physicochemical parameters for use in fish respiratory physiology. In *Fish Physiology*, vol. XA (ed. W. S. Hoar and D. J. Randall), pp. 403–430. London: Academic Press, Inc.
- CAMERON, J. N. (1986). Responses to reversed  $\text{NH}_3$  and  $\text{NH}_4^+$  gradients in a teleost (*Ictalurus punctatus*), an elasmobranch (*Raja erinacea*) and a crustacean (*Callinectes sapidus*): Evidence for  $\text{NH}_4^+/\text{H}^+$  exchange in the teleost and the elasmobranch. *J. exp. Zool.* **239**, 183–195.
- CAMERON, J. N. AND HEISLER, N. (1983). Studies of ammonia in the rainbow trout: physico-chemical parameters, acid–base behaviour and respiratory clearance. *J. exp. Biol.* **105**, 107–125.
- CAMERON, J. N. AND HEISLER, N. (1985). Ammonia transfer across fish gills: A review. In *Proceedings in Life Sciences, Circulation, Respiration and Metabolism* (ed. R. Gilles), pp. 91–100. Heidelberg: Springer-Verlag.
- CAMERON, J. N. AND KORMANIK, G. A. (1982). The acid–base responses of the gills and kidneys to infused acid and base loads in the channel catfish, *Ictalurus punctatus*. *J. exp. Biol.* **99**, 143–160.
- CLAIBORNE, J. B. AND EVANS, D. H. (1988). Ammonia and acid–base balance during high ammonia exposure in a marine teleost (*Myoxocephalus octodecimspinosus*). *J. exp. Biol.* **140**, 89–105.
- EVANS, D. H. (1984). The roles of gill permeability and transport mechanisms in euryhalinity. In *Fish Physiology*, vol. XB (ed. W. S. Hoar and D. J. Randall), pp. 239–283. New York: Academic Press Inc.

- EVANS, D. H. AND CAMERON, J. N. (1986). Gill ammonia transport. *J. exp. Zool.* **239**, 17–23.
- FROMM, G. O. (1963). Studies on renal and extra-renal excretion in a freshwater teleost, *Salmo gairdneri*. *Comp. Biochem. Physiol.* **10**, 121–128.
- GIRARD, J. O. AND PAYAN, P. (1980). Ion exchanges through respiratory and chloride cells in freshwater and seawater adapted teleosts. *Am. J. Physiol.* **238**, R260–R268.
- GOSS, G. G. AND WOOD, C. M. (1990). Na<sup>+</sup> and Cl<sup>-</sup> uptake kinetics, diffusive effluxes and acidic equivalent fluxes across the gills of rainbow trout. I. Responses to environmental hyperoxia. *J. exp. Biol.* **152**, 521–547.
- GOSS, G. G. AND WOOD, C. M. (1991). Two substrate kinetic analysis: a novel approach linking ion and acid–base transport at the gills of freshwater rainbow trout (*Oncorhynchus mykiss*). *J. comp. Physiol.* **B 161**, 635–640.
- HEISLER, N. (1990). Mechanisms of ammonia elimination in fishes. In *Animal Nutrition and Transport Processes. 2. Transport, Respiration and Excretion: Comparative and Environmental Aspects, Comparative Physiology* (ed. J. P. Truchot and B. Lahlou), pp. 137–151. Basel: Karger.
- KINSELLA, J. L. AND ARONSON, P. J. (1981). Interaction of NH<sub>4</sub><sup>+</sup> and Li<sup>+</sup> with the renal microvillus membrane Na<sup>+</sup>–H<sup>+</sup> exchanger. *Am. J. Physiol.* **241**, C220–C226.
- KIRSCHNER, L. B., GREENWALD, L. AND KERSTETTER, T. H. (1973). Effect of amiloride on sodium transport across body surfaces of freshwater animals. *Am. J. Physiol.* **224**, 832–837.
- LIN, H. AND RANDALL, D. J. (1990). The effect of varying water pH on the acidification of expired water in rainbow trout. *J. exp. Biol.* **149**, 149–160.
- MAETZ, J. (1956). Les échanges de sodium chez le poisson *Carassius auratus* L. Action d'un inhibiteur de l'anhydrase carbonique. *J. Physiol., Paris* **48**, 1085–1099.
- MAETZ, J. (1973). Na<sup>+</sup>/NH<sub>4</sub><sup>+</sup>, Na<sup>+</sup>/H<sup>+</sup> exchange and NH<sub>3</sub> movement across the gill of *Carassius auratus*. *J. exp. Biol.* **58**, 255–275.
- MAETZ, J. AND GARCIA-ROMEU, F. (1964). The mechanism of sodium and chloride uptake by the gills of a freshwater fish, *Carassius auratus*. II. Evidence for NH<sub>4</sub><sup>+</sup>/Na<sup>+</sup> and HCO<sub>3</sub><sup>-</sup>/Cl<sup>-</sup> exchanges. *J. gen. Physiol.* **47**, 1209–1227.
- MCDONALD, D. G., HÖBE, H. AND WOOD, C. M. (1980). The influence of calcium on the physiological responses of the rainbow trout, *Salmo gairdneri*, to low environment pH. *J. exp. Biol.* **88**, 109–131.
- MCDONALD, D. G. AND PRIOR, E. T. (1988). Branchial mechanisms of ion and acid–base regulation in the freshwater rainbow trout, *Salmo gairdneri*. *Can. J. Zool.* **66**, 2699–2708.
- OGATA, H. AND MURAI, T. (1988). Changes in ammonia and amino acid levels in the erythrocytes and plasma of carp, *Cyprinus carpio*, during passage through the gills. *J. Fish Biol.* **33**, 471–479.
- PAYAN, P. (1978). A study of the Na<sup>+</sup>/NH<sub>4</sub><sup>+</sup> exchange across the gill of the perfused head of the trout (*Salmo gairdneri*). *J. comp. Physiol.* **124**, 181–188.
- PAYAN, P., GIRARD, J. P. AND MAYER-GOSTAN, N. (1984). Branchial ion movements in teleosts: the roles of respiratory and chloride cells. In *Fish Physiology*, vol. XB (ed. W. S. Hoar and D. J. Randall), pp. 39–63. London: Academic Press, Inc.
- PAYAN, P. AND MATTY, A. J. (1975). The characteristics of ammonia excretion by a perfused isolated head of trout (*Salmo gairdneri*): Effect of temperature and CO<sub>2</sub>-free Ringer. *J. comp. Physiol.* **B 96**, 167–184.
- PISAM, M., CAROFF, A. AND RAMBOURG, A. (1987). Two types of chloride cells in the gill epithelium of a freshwater-adapted euryhaline fish: *Lebistes reticulatus*; their modifications during adaptation to saltwater. *Am. J. Anat.* **179**, 40–50.
- PLAYLE, R. C. AND WOOD, C. M. (1989). Water chemistry changes in the gill micro-environment of rainbow trout: experimental observations and theory. *J. comp. Physiol.* **B 159**, 527–537.
- RANDALL, D. J., LIN, H. AND WRIGHT, P. A. (1991). Gill water flow and the chemistry of the boundary layer. *Physiol. Zool.* **64**, 26–38.
- RANDALL, D. J. AND WRIGHT, P. A. (1987). Ammonia distribution and excretion in fish. *Fish Physiol. Biochem.* **3**, 107–120.
- SARDET, C. (1980). Freeze fracture of the gill epithelium of euryhaline teleost fish. *Am. J. Physiol.* **238**, R207–R212.
- SAYER, M. D. J. AND DAVENPORT, J. (1987). The relative importance of the gills to ammonia and urea excretion in five seawater and one freshwater teleost species. *J. Fish Biol.* **31**, 561–570.
- SMITH, H. (1929). The excretion of ammonia and urea by the gills of fish. *J. biol. Chem.* **81**, 727–742.
- SOVIO, A., WESTMAN, K. AND NYHOLM, K. (1972). Improved method of dorsal aorta catheterization:

- haematological effects followed for three weeks in rainbow trout (*Salmo gairdneri*). *Finnish Fish. Res.* **1**, 11–21.
- VERDOUW, H., VAN ECHELD, C. J. A. AND DEKKERS, E. M. J. (1978). Ammonia determinations based on indophenol formation with sodium salicylate. *Water Res.* **12**, 399–402.
- WILKIE, M. P. AND WOOD, C. M. (1991). Nitrogenous waste excretion, acid–base regulation and ionoregulation in rainbow trout (*Oncorhynchus mykiss*) exposed to extremely alkaline water. *Physiol. Zool.* **64**, 1069–1086.
- WILSON, R. W. AND TAYLOR, E. W. (1992). Transbranchial ammonia gradients and acid–base responses to high external ammonia concentration in rainbow trout (*Oncorhynchus mykiss*) acclimated to different salinities. *J. exp. Biol.* **166**, 95–112.
- WOLF, K. (1963). Physiological salines for freshwater teleosts. *Progve Fish Cult.* **25**, 135–140.
- WOOD, C. M. (1988). Acid–base and ionic exchanges at the gills and kidney after exhaustive exercise in the rainbow trout. *J. exp. Biol.* **136**, 461–481.
- WOOD, C. M. (1989). The physiological problems of fish in acid waters. In *Acid Toxicity and Aquatic Animals* (ed. R. Morris, E. W. Taylor, D. J. A. Brown and J. A. Brown), pp. 125–152. Cambridge: Cambridge University Press.
- WOOD, C. M. (1993). Ammonia and urea metabolism and excretion. In *The Physiology of Fishes*. (ed. D. H. Evans). Baton Rouge: CRC Press. pp. 379–425.
- WOOD, C. M., McDONALD, D. G. AND McMAHON, B. R. (1982). The influence of experimental anaemia on blood acid–base regulation *in vivo* and *in vitro* in the starry flounder (*Platichthys flesus*) and the rainbow trout (*Salmo gairdneri*). *J. exp. Biol.* **96**, 221–237.
- WRIGHT, P. A., HEMING, T. AND RANDALL, D. J. (1986). Downstream pH changes in water flowing over the gills of rainbow trout. *J. exp. Biol.* **126**, 499–512.
- WRIGHT, P. A., IWAMA, G. K. AND WOOD, C. M. (1993). Ammonia and urea excretion in Lahontan cutthroat trout (*Oncorhynchus clarki henshawi*) adapted to the highly alkaline Pyramid lake (pH 9.4). *J. exp. Biol.* **175**, 153–172.
- WRIGHT, P. A., RANDALL, D. J. AND PERRY, S. F. (1989). Fish gill boundary layer: a site of linkage between carbon dioxide and ammonia excretion. *J. comp. Physiol.* **158**, 627–635.
- WRIGHT, P. A. AND WOOD, C. M. (1985). An analysis of branchial ammonia excretion in the freshwater rainbow trout: effects of environmental pH change and sodium uptake blockade. *J. exp. Biol.* **114**, 329–353.
